# Supplementary material
Source: PubMed Central journal article supplement (PMC3419355)
Supplement: NIHMS386550-supplement-01.pdf [file NIHMS386550-supplement-01.pdf]

1 **Supporting material**

2

RT: 6.70 - 59.07

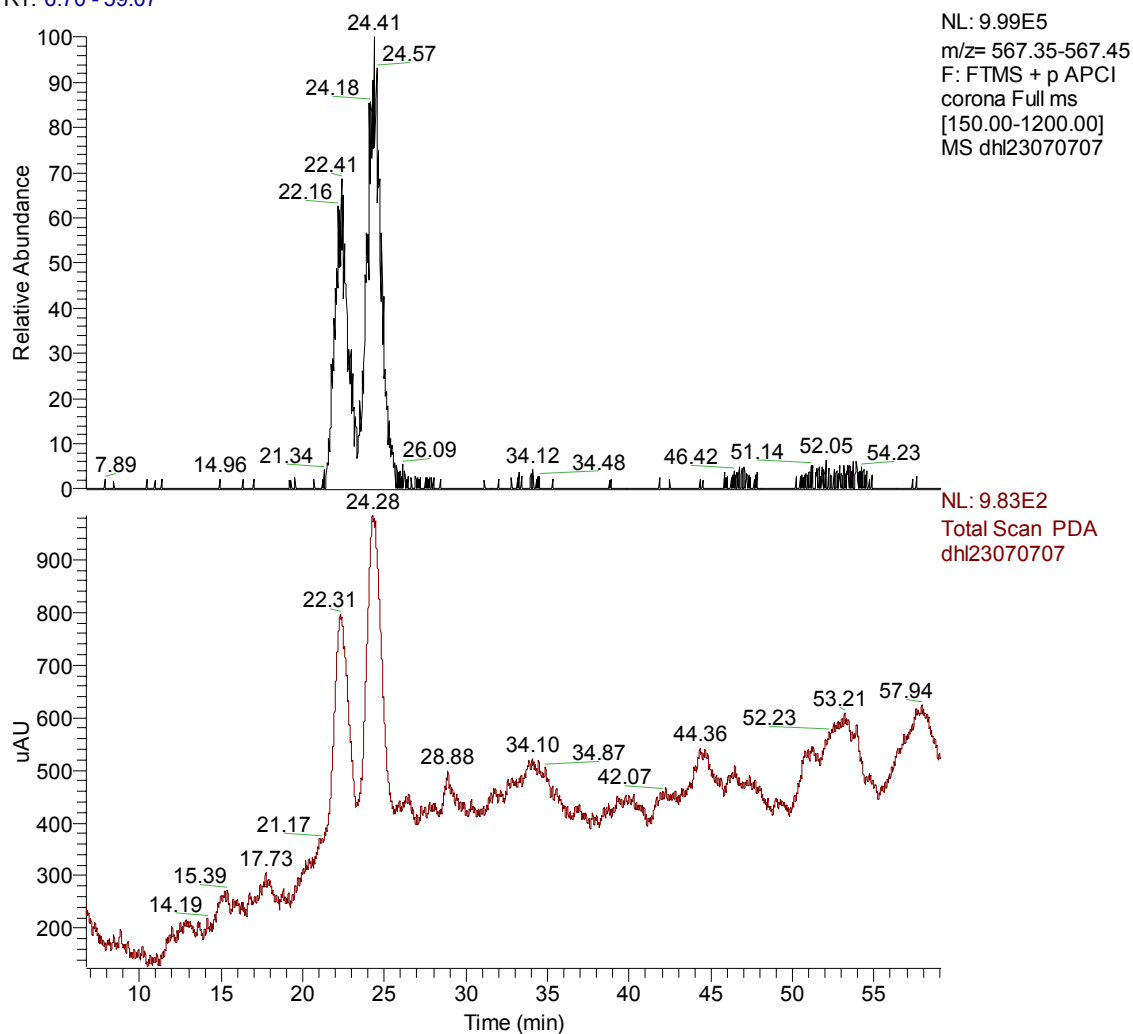

3  
4 **Figure 1:** Chiral-phase HPLC analysis of DhL obtained from egg yolk showing the separation  
5 of the two diastereomers, (3R,6'R)-DhL at 22.31 min and (3R,6'S)-DhL at 24.28 min.  
6 Chromatograms with APCI<sup>+</sup>-HR-MS detection, scans m/z 567.35-567.55 (top), and total scan  
7 photo-diode detection, 300-600 nm (bottom).

8  
9

dhl23070707 #3825-4018 RT: 21.80-22.86 AV: 48 NL: 4.30E5  
 F: FTMS + p APCI corona Full ms [150.00-1200.00]

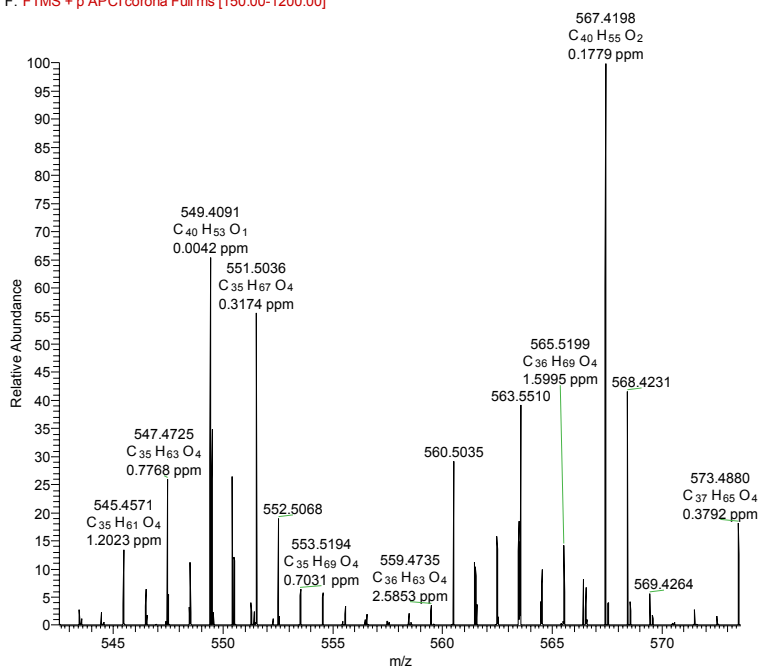

1  
2

dhl23070707 #4210-4376 RT: 23.98-24.91 AV: 42 NL: 6.79E5  
 F: FTMS + p APCI corona Full ms [150.00-1200.00]

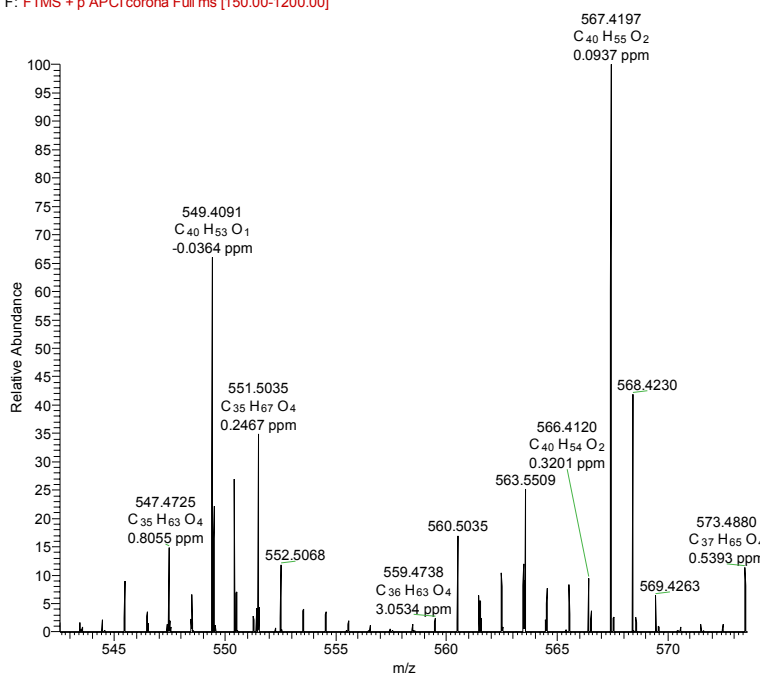

3  
4  
5  
6  
7  
8  
9

**Figure 2:** High-resolution mass spectra from the peaks of the two diastereomers, (3R,6'R)-DhL, top, and (3R,6'S)-DhL, bottom, separated on chiral-phase HPLC. The molecular ions  $[M+H]^+$  are detected at  $m/z$  567.4198 and 567.4197, and a prominent fragment  $[M+H-H_2O]^+$  at  $m/z$  549.4091. All other mass peaks are from the background.

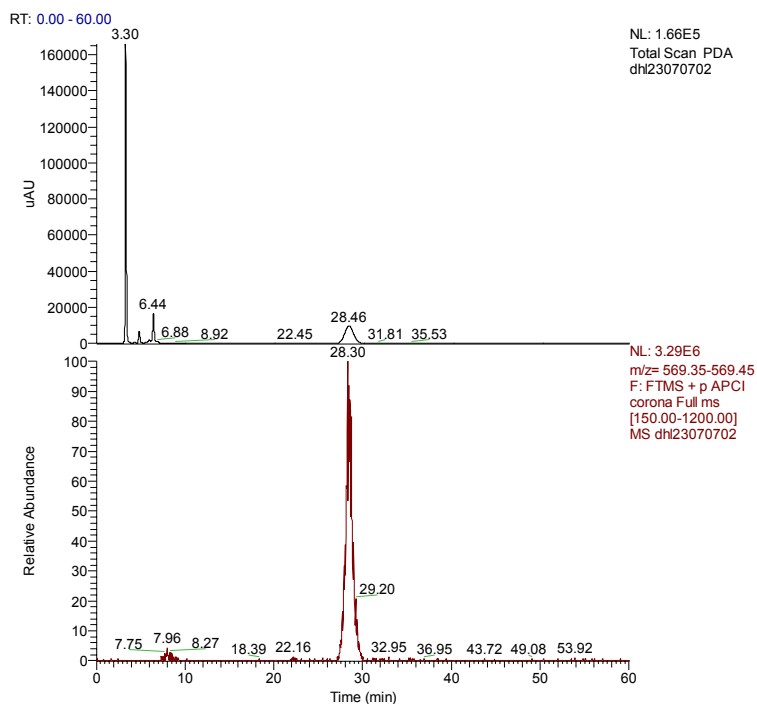1  
2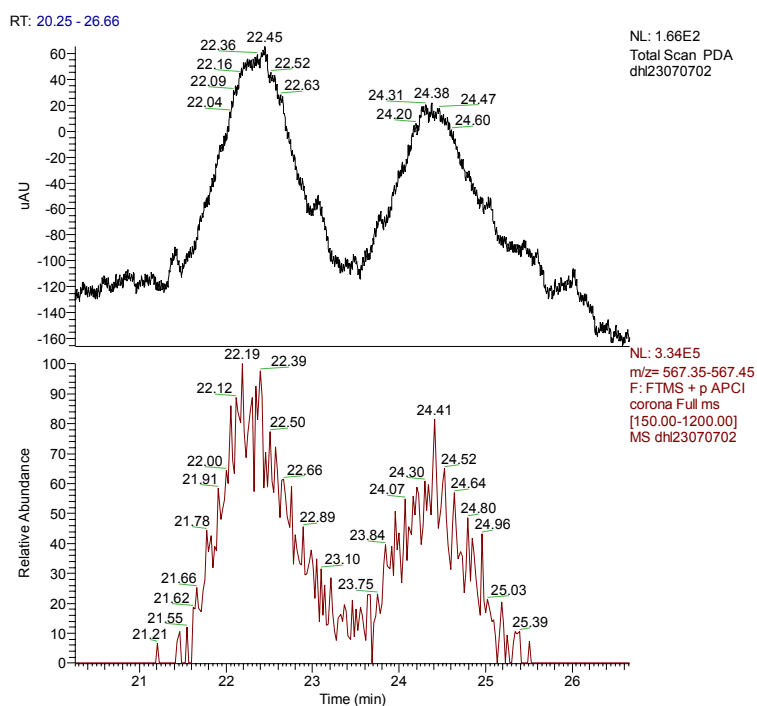3  
4  
5  
6  
7  
8  
9

**Figure 3:** Chiral-phase HPLC chromatogram of rhesus monkey plasma from Zea supplemented group. (3R,6'R)-DhL at 22.45 min, (3R,6'S)-DhL at 24.38 min and Zea at 28.46 min. Chromatograms of APCI<sup>+</sup>-HR-MS detection, scans m/z 569.35-56.55 and total scan photo-diode detection, 300-600 nm (top), enlargement of DhL peaks, PDA and m/z 567.35-567.55 (bottom).

RT: 3.90 - 9.10

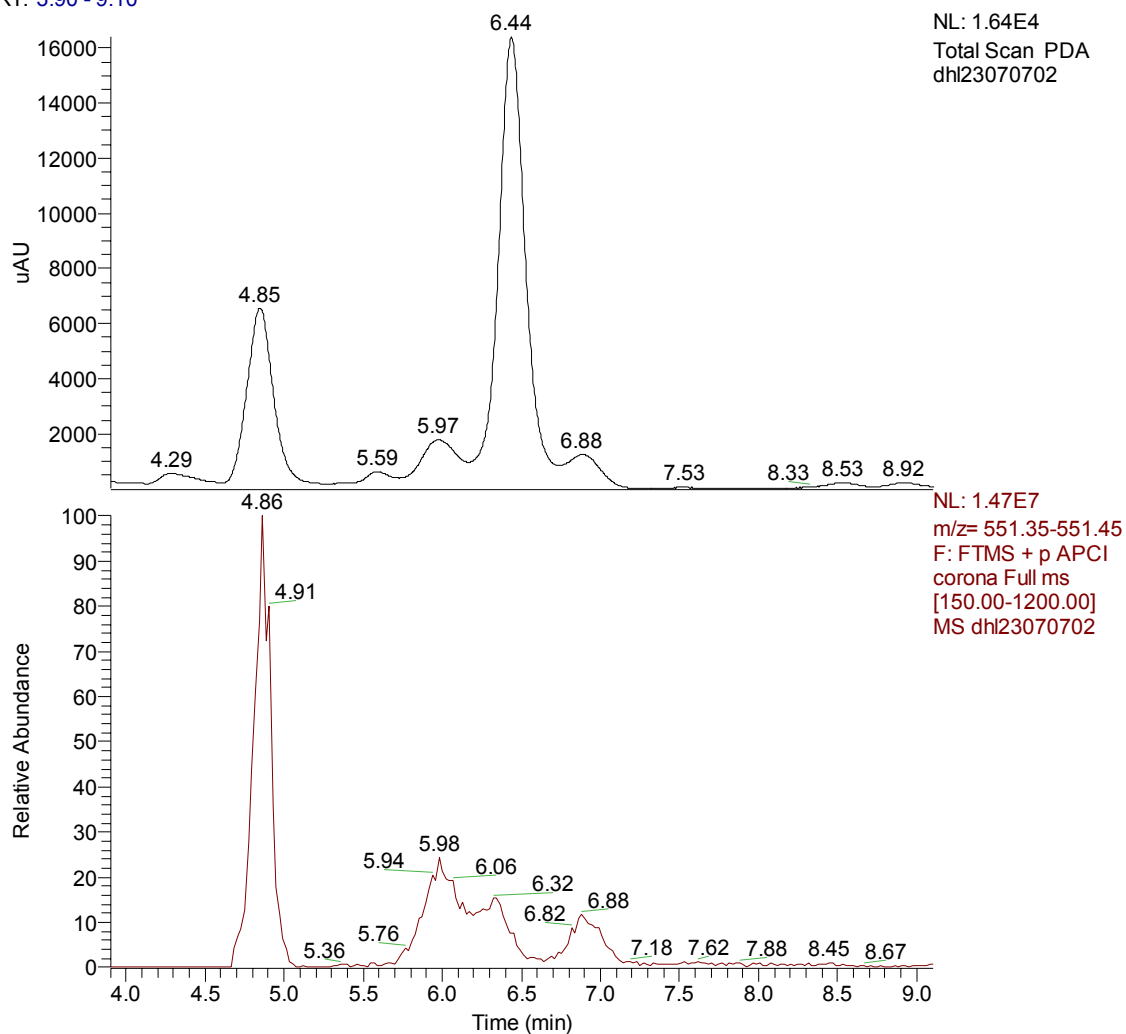

1  
2 **Figure 4:** Just as an example: enlargement of the region with the possible anhydrolutein peaks  
3 at 5.97, 6.32 and 6.88 min, PDA trace (top) and HR-MS trace (bottom). Remaining peaks are  
4 not due to carotenoids.  
5  
6
